# Supplementary material for: Transition metal-tetracyanoquinodimethane monolayers as single-atom catalysts for the electrocatalytic nitrogen reduction reaction
Source: Royal Society of Chemistry journal article supplement (doi:10.1039/d0ma00348d), 2020-01-01
Supplement: d0ma00348d1.pdf [file d0ma00348d1.pdf]

## Supporting information

# Transition Metal-Tetracyanoquinodimethane Monolayers as Single-Atom Catalysts for Electrocatalytic Nitrogen Reduction Reaction

*Yiran Ying<sup>a</sup>, Ke Fan<sup>a</sup>, Xin Luo<sup>b\*</sup>, Jinli Qiao<sup>c</sup>, and Haitao Huang<sup>a\*</sup>*

<sup>a</sup> Department of Applied Physics, The Hong Kong Polytechnic University, Hung Hom,  
Kowloon, Hong Kong, P.R. China

<sup>b</sup> School of Physics, Sun Yat-sen University, Guangzhou, Guangdong Province, P.R. China,  
510275

<sup>c</sup> College of Environmental Science and Engineering, State Key Laboratory for Modification of  
Chemical Fibers and Polymer Materials, Donghua University, Shanghai 201620 (China)

### **Corresponding Author**

\*E-mail: luox77@mail.sysu.edu.cn; aphhuang@polyu.edu.hk

**Table S1.** Optimized lattice constants  $a$  and  $b$  for TM-TCNQ (TM=Sc-Zn, Mo, Ru-Pd, Ag, Pt, Au).

| <b>System</b>  | $a$ (Å) | $b$ (Å) | <b>System</b>  | $a$ (Å) | $b$ (Å) |
|----------------|---------|---------|----------------|---------|---------|
| <b>Sc-TCNQ</b> | 7.266   | 11.702  | <b>Zn-TCNQ</b> | 7.158   | 11.423  |
| <b>Ti-TCNQ</b> | 7.162   | 11.559  | <b>Mo-TCNQ</b> | 7.041   | 11.522  |
| <b>V-TCNQ</b>  | 7.095   | 11.455  | <b>Ru-TCNQ</b> | 7.014   | 11.354  |
| <b>Cr-TCNQ</b> | 7.043   | 11.332  | <b>Rh-TCNQ</b> | 7.028   | 11.326  |
| <b>Mn-TCNQ</b> | 7.015   | 11.295  | <b>Pd-TCNQ</b> | 7.030   | 11.363  |
| <b>Fe-TCNQ</b> | 6.938   | 11.193  | <b>Ag-TCNQ</b> | 7.381   | 11.758  |
| <b>Co-TCNQ</b> | 6.886   | 11.161  | <b>Pt-TCNQ</b> | 7.022   | 11.368  |
| <b>Ni-TCNQ</b> | 6.974   | 11.208  | <b>Au-TCNQ</b> | 7.297   | 11.549  |
| <b>Cu-TCNQ</b> | 7.183   | 11.371  |                |         |         |

**Table S2.** Adsorption energies  $E_{ad}$  (eV) of  $N_2$  onto the TM-TCNQ (TM=Sc-Zn, Mo, Ru-Pd, Ag, Pt, Au) with both end-on and side-on configurations. Catalysts with favorable  $E_{ad}$  value for NRR are marked in red.

| <b>System</b>  | <b>End-on</b> | <b>Side-on</b> | <b>System</b>  | <b>End-on</b> | <b>Side-on</b> |
|----------------|---------------|----------------|----------------|---------------|----------------|
| <b>Sc-TCNQ</b> | <b>-0.63</b>  | <b>-0.33</b>   | <b>Zn-TCNQ</b> | -0.11         | -0.05          |
| <b>Ti-TCNQ</b> | <b>-0.97</b>  | <b>-0.56</b>   | <b>Mo-TCNQ</b> | -0.06         | -0.06          |
| <b>V-TCNQ</b>  | <b>-1.16</b>  | <b>-0.50</b>   | <b>Ru-TCNQ</b> | -0.03         | -0.07          |
| <b>Cr-TCNQ</b> | <b>-1.20</b>  | -0.09          | <b>Rh-TCNQ</b> | -0.03         | -0.07          |
| <b>Mn-TCNQ</b> | <b>-0.96</b>  | -0.04          | <b>Pd-TCNQ</b> | -0.05         | -0.07          |
| <b>Fe-TCNQ</b> | <b>-0.45</b>  | -0.08          | <b>Ag-TCNQ</b> | -0.01         | -0.01          |
| <b>Co-TCNQ</b> | 0.08          | 0.04           | <b>Pt-TCNQ</b> | -0.05         | -0.07          |
| <b>Ni-TCNQ</b> | 0.05          | 0.02           | <b>Au-TCNQ</b> | -0.27         | -0.28          |
| <b>Cu-TCNQ</b> | -0.05         | -0.06          |                |               |                |

**Table S3.** DFT-calculated total energy  $E_{\text{DFT}}$ , zero point energy  $E_{\text{ZPE}}$ , and entropic contribution term TS for NRR and HER intermediates on Sc-TCNQ.

| <b>Adsorbates</b>                      | <b><math>E_{\text{DFT}}</math> (eV)</b> | <b><math>E_{\text{ZPE}}</math> (eV)</b> | <b>TS (eV)</b> |
|----------------------------------------|-----------------------------------------|-----------------------------------------|----------------|
| <b>*</b>                               | -162.539                                | 0                                       | 0              |
| <b>*N-N</b>                            | -179.776                                | 0.177                                   | 0.141          |
| <b>*N-NH</b>                           | -181.070                                | 0.399                                   | 0.125          |
| <b>*N-N*</b>                           | -179.468                                | 0.161                                   | 0.145          |
| <b>*N-NH*</b>                          | -182.793                                | 0.484                                   | 0.163          |
| <b>*N-NH<sub>2</sub>*</b>              | -186.253                                | 0.474                                   | 0.281          |
| <b>*NH-NH*</b>                         | -186.306                                | 0.719                                   | 0.146          |
| <b>*N</b>                              | -167.512                                | 0.042                                   | 0.116          |
| <b>*NH-NH<sub>2</sub>*</b>             | -191.059                                | 1.119                                   | 0.152          |
| <b>*NH<sub>2</sub>-NH<sub>2</sub>*</b> | -193.786                                | 1.441                                   | 0.211          |
| <b>*NH</b>                             | -173.978                                | 0.325                                   | 0.114          |
| <b>*NH<sub>2</sub></b>                 | -179.883                                | 0.641                                   | 0.139          |
| <b>*NH<sub>3</sub></b>                 | -183.323                                | 1.014                                   | 0.174          |
| <b>*H</b>                              | -166.185                                | 0.145                                   | 0.027          |

**Table S4.** DFT-calculated total energy  $E_{\text{DFT}}$ , zero point energy  $E_{\text{ZPE}}$ , and entropic contribution term TS for NRR and HER intermediates on Ti-TCNQ.

| <b>Adsorbates</b>                      | <b><math>E_{\text{DFT}}</math> (eV)</b> | <b><math>E_{\text{ZPE}}</math> (eV)</b> | <b>TS (eV)</b> |
|----------------------------------------|-----------------------------------------|-----------------------------------------|----------------|
| <b>*</b>                               | -162.820                                | 0                                       | 0              |
| <b>*N-N</b>                            | -180.394                                | 0.217                                   | 0.089          |
| <b>*N-NH</b>                           | -182.135                                | 0.404                                   | 0.060          |
| <b>*N-N*</b>                           | -179.972                                | 0.204                                   | 0.096          |
| <b>*N-NH*</b>                          | -183.212                                | 0.481                                   | 0.114          |
| <b>*N-NH<sub>2</sub>*</b>              | -187.236                                | 0.826                                   | 0.104          |
| <b>*NH-NH*</b>                         | -186.476                                | 0.711                                   | 0.147          |
| <b>*N</b>                              | -170.319                                | 0.070                                   | 0.078          |
| <b>*NH-NH<sub>2</sub>*</b>             | -191.484                                | 1.123                                   | 0.213          |
| <b>*NH<sub>2</sub>-NH<sub>2</sub>*</b> | -194.089                                | 1.459                                   | 0.221          |
| <b>*NH</b>                             | -176.090                                | 0.348                                   | 0.090          |
| <b>*NH<sub>2</sub></b>                 | -180.398                                | 0.659                                   | 0.115          |
| <b>*NH<sub>3</sub></b>                 | -183.731                                | 1.021                                   | 0.167          |
| <b>*H</b>                              | -166.752                                | 0.162                                   | 0.021          |

**Table S5.** DFT-calculated total energy  $E_{\text{DFT}}$ , zero point energy  $E_{\text{ZPE}}$ , and entropic contribution term TS for NRR and HER intermediates on V-TCNQ.

| <b>Adsorbates</b>                      | <b><math>E_{\text{DFT}}</math> (eV)</b> | <b><math>E_{\text{ZPE}}</math> (eV)</b> | <b>TS (eV)</b> |
|----------------------------------------|-----------------------------------------|-----------------------------------------|----------------|
| <b>*</b>                               | -162.840                                | 0                                       | 0              |
| <b>*N-N</b>                            | -180.601                                | 0.216                                   | 0.133          |
| <b>*N-NH</b>                           | -182.660                                | 0.424                                   | 0.104          |
| <b>*N-N*</b>                           | -179.932                                | 0.177                                   | 0.117          |
| <b>*N-NH*</b>                          | -182.884                                | 0.477                                   | 0.107          |
| <b>*N-NH<sub>2</sub>*</b>              | -187.238                                | 0.825                                   | 0.097          |
| <b>*NH-NH*</b>                         | -186.794                                | 0.770                                   | 0.110          |
| <b>*N</b>                              | -171.575                                | 0.075                                   | 0.028          |
| <b>*NH-NH<sub>2</sub>*</b>             | -191.076                                | 1.115                                   | 0.157          |
| <b>*NH<sub>2</sub>-NH<sub>2</sub>*</b> | -193.974                                | 1.531                                   | 0.103          |
| <b>*NH</b>                             | -176.181                                | 0.341                                   | 0.051          |
| <b>*NH<sub>2</sub></b>                 | -180.154                                | 0.677                                   | 0.095          |
| <b>*NH<sub>3</sub></b>                 | -183.779                                | 1.030                                   | 0.150          |
| <b>*H</b>                              | -166.756                                | 0.173                                   | 0.021          |

**Table S6.** Zero point energy  $E_{ZPE}$  and entropic contribution term TS for  $H_2$ ,  $N_2$ , and  $NH_3$  in their gas phases. Values of TS for gases under  $T=298.15$  K are extracted from NIST database (<https://doi.org/10.18434/T4D303>).

| <b>Gas</b>               | <b><math>E_{ZPE}</math> (eV)</b> | <b>TS (eV)</b> |
|--------------------------|----------------------------------|----------------|
| <b><math>H_2</math></b>  | 0.269                            | 0.404          |
| <b><math>N_2</math></b>  | 0.151                            | 0.592          |
| <b><math>NH_3</math></b> | 0.939                            | 0.596          |

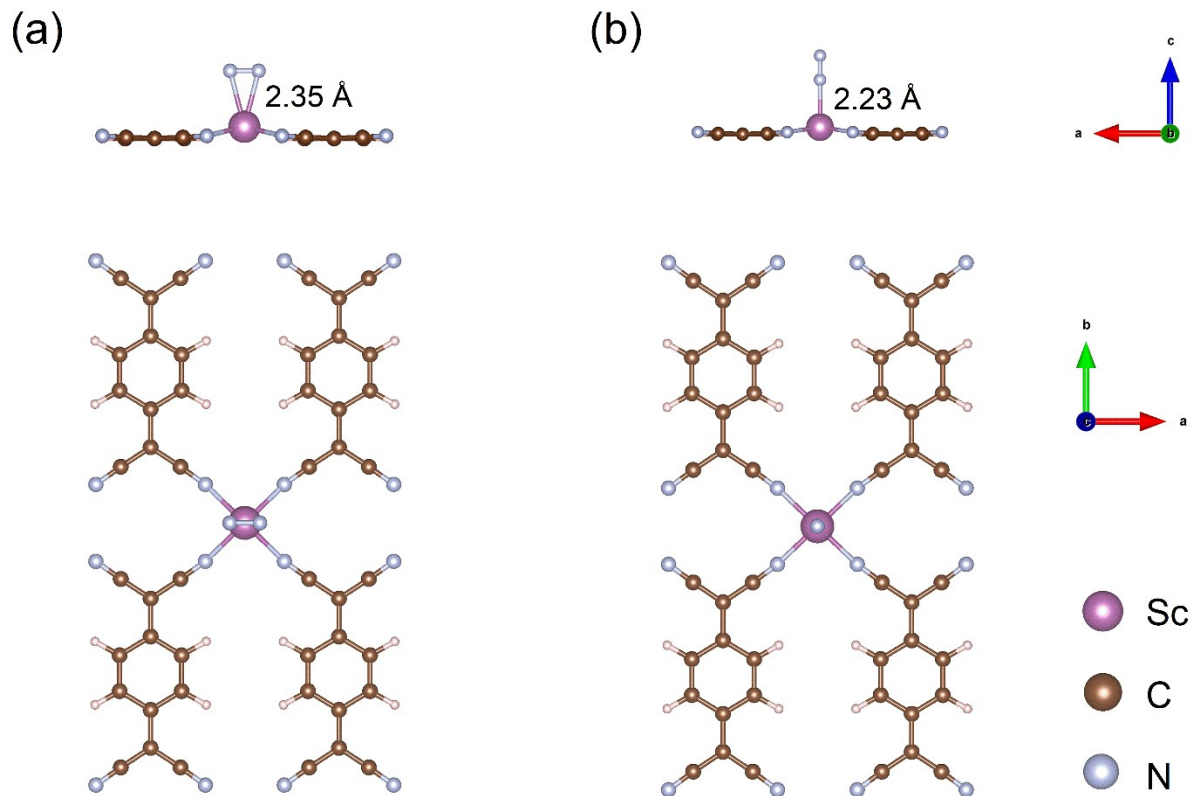

**Fig. S1** Side and top view of the schematic geometric structures of  $N_2$  adsorbed on Sc-TCNQ with (a) side-on configuration and (b) end-on configuration. Sc, C, N, H are represented in purple, brown, cyan, and pale pink, respectively. Sc-N bond length values are also marked in the figure.



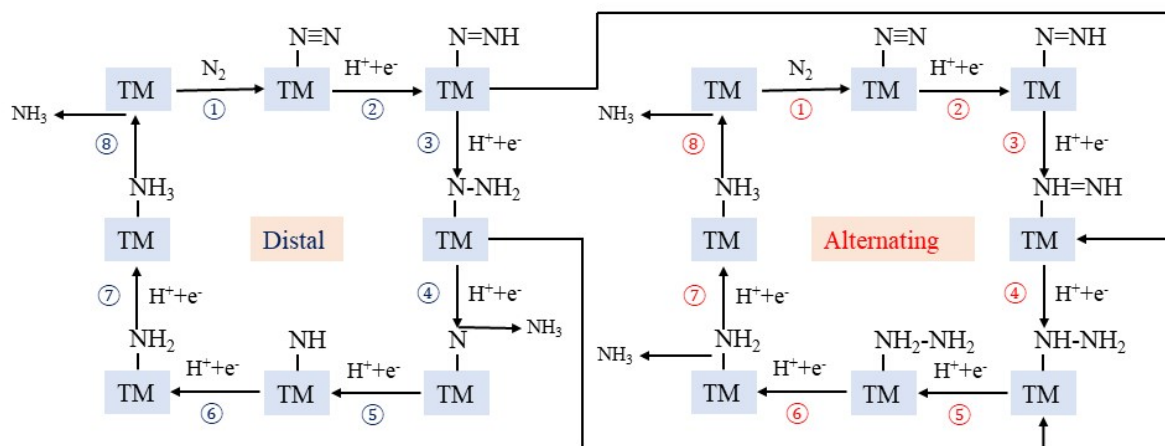

**Fig. S2** Schematic illustration of distal, alternating, and their mixed mechanisms for NRR on TM-TCNQ. TM denotes transition metal atom (active site) in the figures.

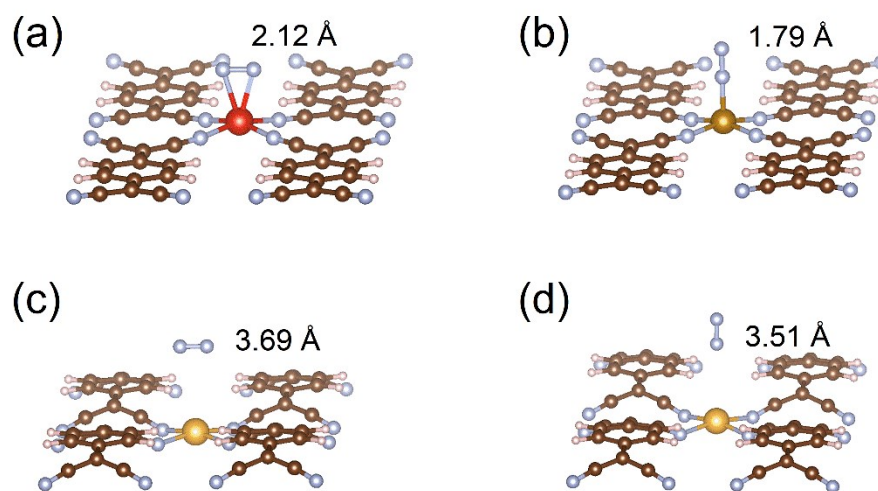

**Fig. S3** DFT-optimized structures of  $N_2$  adsorbed on (a) V-TCNQ with side-on configuration, (b) Fe-TCNQ with end-on configuration, and on Au-TCNQ with (c) side-on and (d) end-on configuration. The V-N and Fe-N bond length values in (a)(b) as well as the smallest distance between Au and N atoms in (c)(d) are marked.

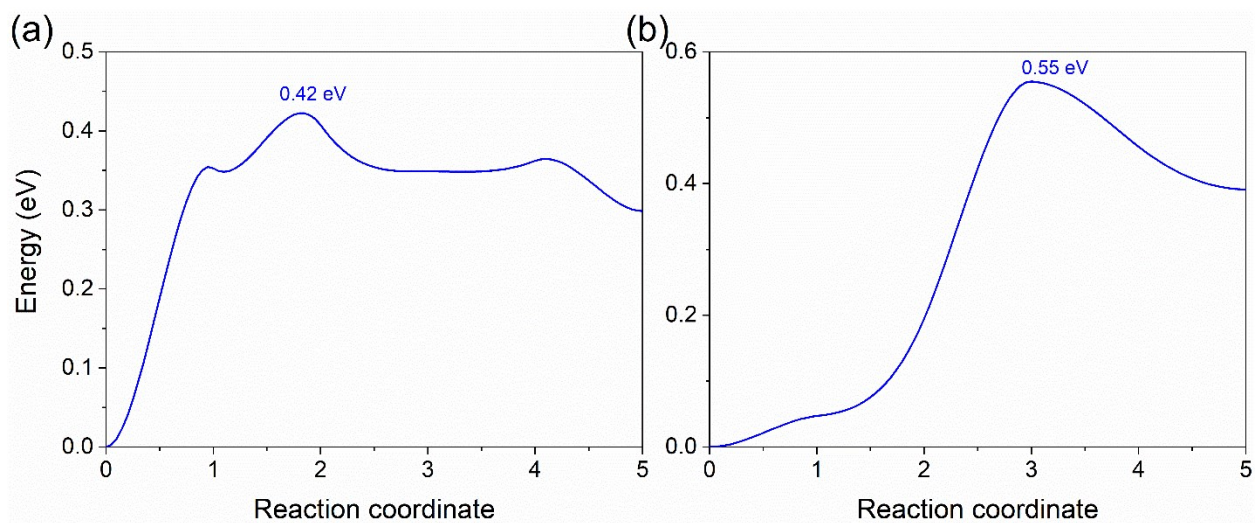

**Fig. S4** Minimum energy path for the transformation from end-on to side-on N<sub>2</sub> adsorption on (a) Sc- and (b) Ti-TCNQ calculated by CI-NEB method.

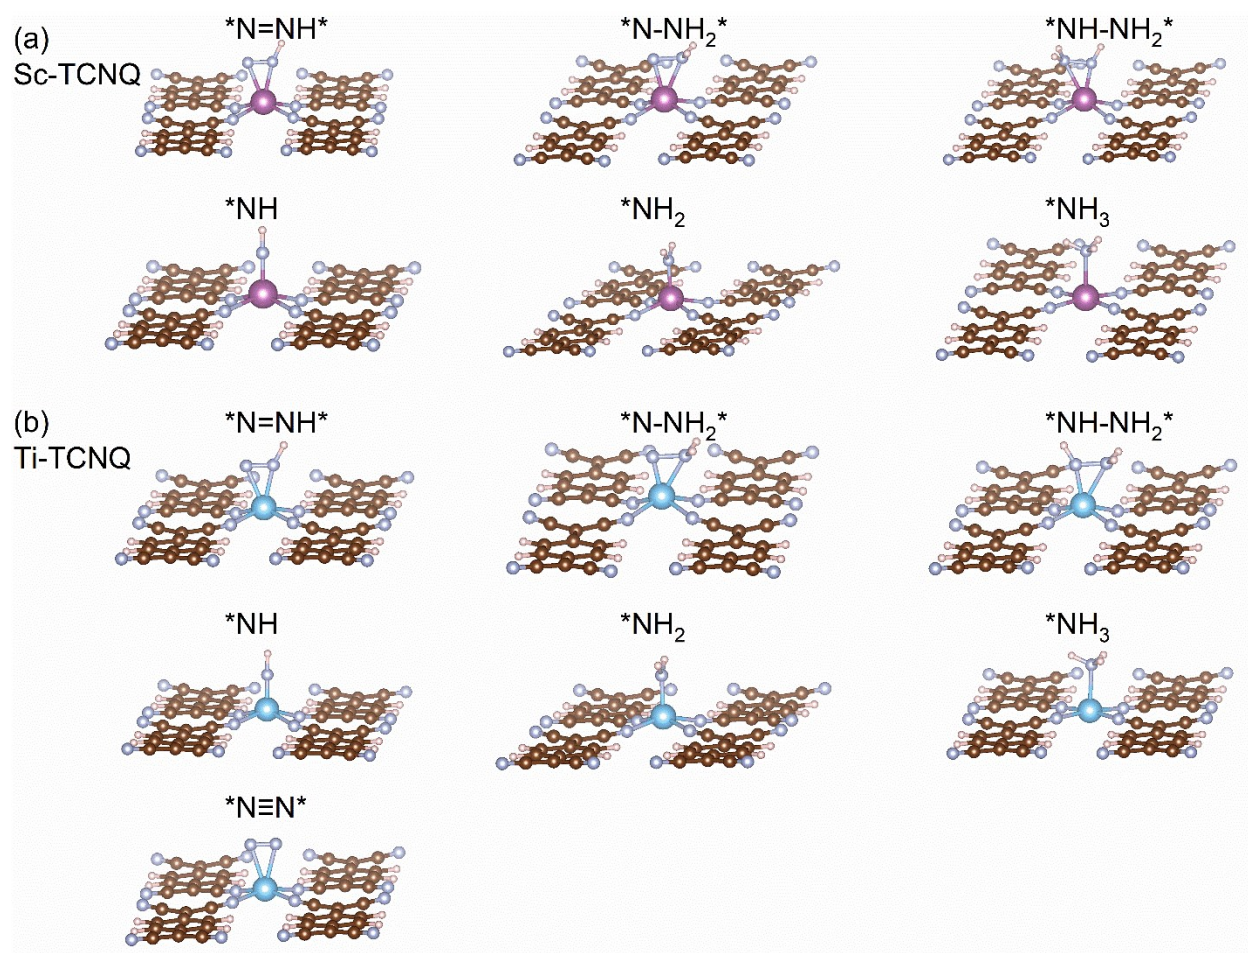

**Fig. S5** DFT-optimized structures for all intermediates in the NRR along the most favorable pathway for (a) Sc-TCNQ and (b) Ti-TCNQ except for  $*N\equiv N*$  on Sc-TCNQ (already shown in Fig. S1a). C, N, H, Sc, and Ti are represented in brown, cyan, pale pink, purple, and blue, respectively.

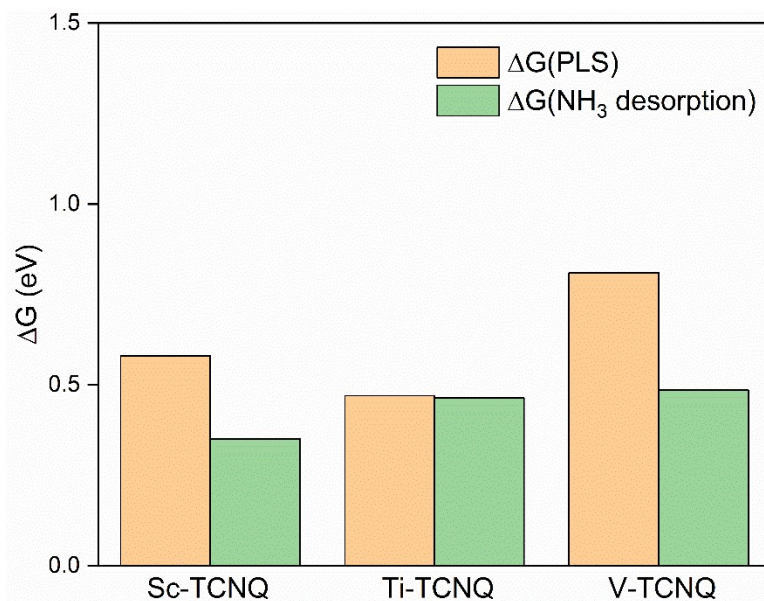

**Fig. S6** Comparison between Gibbs free energy change of potential-limiting step (PLS) for NRR (marked in orange in Fig. 5) and  $\text{NH}_3$  desorption free energy for Sc-, Ti-, and V-TCNQ.

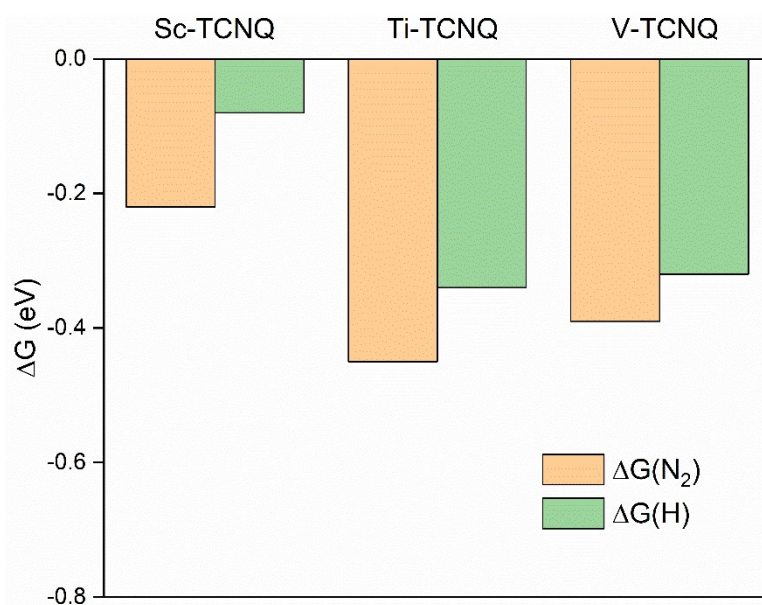

**Fig. S7** Comparison between adsorption Gibbs free energy for  $\text{N}_2$  and H for Sc-, Ti-, and V-TCNQ. The adsorption Gibbs free energy for species M was defined as  $\Delta G(\text{M}) = G(*\text{M}) - G(*) - G(\text{M})$ , where \* denotes the active site.

### **Supplementary Notes 1.** Justification of 4-coordinated TM-TCNQ structures in the calculations

The geometric structure of 4-coordinated transition metal atom to nitrogen in TM-TCNQ network was confirmed by pioneer experimental observations (e.g. scanning tunneling microscopy, STM) in *Phys. Rev. Lett.*, 2013, **110**, 027202; *J. Phys. Chem. C*, 2011, **115**, 10211; *J. Phys. Chem. C*, 2010, **114**, 17197, indicating that the structure is indeed stable under lab conditions. The 4-coordinated TM-TCNQ structure was used in our calculations and other theoretical work (*Phys. Chem. Chem. Phys.*, 2018, **20**, 5173; *J. Catal.*, 2019, **370**, 378; *J. Mater. Chem. A*, 2019, **7**, 3805-3814). Other configurations might be possible, but the 4-coordinated TM-TCNQ has already been experimentally fabricated, which provides our results with validity and importance.

### **Supplementary Notes 2.** N<sub>2</sub> adsorption energy and adsorption free energy

There is still controversy in whether N<sub>2</sub> adsorption energy  $E_{ad}$  or adsorption Gibbs free energy  $\Delta G(N_2)$  should be used for screening NRR catalysts. Several studies on computational NRR in recent years used the N<sub>2</sub> adsorption energy instead of  $\Delta G(N_2)$  as an indicator (*J. Am. Chem. Soc.*, 2018, **140**, 14161; *Small Methods*, 2019, **3**, 1800376; *J. Phys. Chem. Lett.*, 2019, **10**, 6984; *J. Am. Chem. Soc.*, 2020, **142**, 308; *J. Am. Chem. Soc.*, 2020, **142**, 5709). Specifically, Ling *et al.* used  $E_{ad} < -0.5$  eV as a criterion for screening NRR single-atom catalysts in a benchmark study (*Small Methods*, 2019, **3**, 1800376), and the criterion was also applied in our work. Nevertheless, to ensure the completeness of our discussion, it is necessary to check whether  $\Delta G(N_2)$  can also favor the spontaneous N<sub>2</sub> adsorption. Fig. S7 shows the  $\Delta G(N_2)$  values for side-on configuration on Sc-, Ti-, and V-TCNQ, and the negative  $\Delta G(N_2)$  indicates that adsorption Gibbs free energy can also fulfill the spontaneous N<sub>2</sub> adsorption.

### Supplementary Notes 3. Explanation of the ‘mixed’ pathway

In the main text, we mention that the energetically favorable pathway for Sc- and Ti-TCNQ is the enzymatic-consecutive mixed pathway. The conclusion is made by comparing the Gibbs free energy changes for different intermediates in NRR. Since both catalyst favors  $*N-NH_2*$  to  $*NH-NH*$  in the second hydrogenation step (Fig. 5), they follow step C1-C3 in the consecutive pathway (Fig. 2); however, for the third step, for Sc- and Ti-TCNQ,  $*NH-NH_2*$  is more favorable than  $*N+NH_3$ , so C4' step instead of C4 is chosen which lead to  $*NH-NH_2*$  intermediate in the enzymatic pathway, followed by E5' step (getting back to  $*NH$  in the consecutive pathway) due to smaller  $\Delta G$  for  $*NH+NH_3$  than  $*NH_2-NH_2*$ . To sum up, because two reaction steps (C4' and E5') for Sc- and Ti-TCNQ include a transformation between conventional consecutive and enzymatic pathways, we define that Sc and Ti-TCNQ go through the enzymatic-consecutive mixed pathway.
